# Supplementary material for: Use of Essential Oil Emulsions to Control Escherichia coli O157:H7 in the Postharvest Washing of Lettuce
Source: MDPI journal article supplement (doi:10.3390/foods12132571), 2023-06-30
Supplement: s1 [file s1]

**Table S1.** Log reductions in *E. coli* O157:H7 compared to no-rinse control obtained from surface-inoculated lettuce (romaine, butterhead, and crisphead) immediately after washing treatments (0 h) and after 24 h and 7 days of storage.

| Treatments        | Storage times                 |       |        |                                  |       |        |                                 |       |        |
|-------------------|-------------------------------|-------|--------|----------------------------------|-------|--------|---------------------------------|-------|--------|
|                   | Romaine (log CFU/g reduction) |       |        | Butterhead (log CFU/g reduction) |       |        | Crisphead (log CFU/g reduction) |       |        |
| <i>Sanitizers</i> | 0 h                           | 24 h  | 7 days | 0 h                              | 24 h  | 7 days | 0 h                             | 24 h  | 7 days |
| OR1               | -0.92                         | -1.41 | -1.36  | -0.15                            | -0.23 | -0.17  | -1.45                           | -1.64 | -1.75  |
| OR2               | -0.51                         | -1.97 | -1.09  | -0.64                            | -0.80 | -1.81  | -2.77                           | -3.03 | -2.98  |
| WS1               | -0.89                         | -1.35 | -1.49  | -0.14                            | 0.11  | 0.14   | -1.63                           | -2.18 | -2.68  |
| WS2               | -0.76                         | -0.81 | -0.61  | -0.67                            | -0.43 | 1.40   | -1.93                           | -1.89 | -2.60  |
| OR:WS1            | -0.68                         | -1.36 | -1.38  | -0.46                            | -0.27 | 0.24   | -2.51                           | -3.52 | -2.86  |
| OR:WS2            | -1.57                         | -1.05 | -1.07  | -1.54                            | -0.85 | -1.31  | -2.65                           | -3.41 | -2.75  |
| 80 ppm PAA        | -0.86                         | -0.62 | -1.88  | -1.82                            | -2.09 | -2.14  | -2.62                           | -2.55 | -2.47  |
| 200 ppm Chlorine  | -1.61                         | -1.61 | -2.27  | -1.62                            | -1.51 | -1.37  | -2.70                           | -2.68 | -2.54  |

Abbreviations: OR: Oregano; WS: Winter Savory; OR:WS: Oregano and Winter Savory mixture; PAA: peroxyacetic acid. EO emulsion concentrations: 1: 0.94  $\mu\text{L/mL}$ ; 2: 1.88  $\mu\text{L/mL}$ .

**Table S2.** Log reductions in *E. coli* O157:H7 compared to no-rinse control obtained from surface non-inoculated lettuce (romaine, butterhead, and crisphead) immediately after washing treatments (0 h) and after 24 h and 7 days of storage.

| Treatments        | Storage times                 |       |        |                                  |       |        |                                 |       |        |
|-------------------|-------------------------------|-------|--------|----------------------------------|-------|--------|---------------------------------|-------|--------|
|                   | Romaine (log CFU/g reduction) |       |        | Butterhead (log CFU/g reduction) |       |        | Crisphead (log CFU/g reduction) |       |        |
| <i>Sanitizers</i> | 0 h                           | 24 h  | 7 days | 0 h                              | 24 h  | 7 days | 0 h                             | 24 h  | 7 days |
| OR1               | -4.32                         | -4.35 | -4.27  | -4.10                            | -3.63 | -3.28  | -3.95                           | -4.24 | -3.98  |

|                  |       |       |       |       |       |       |       |       |       |
|------------------|-------|-------|-------|-------|-------|-------|-------|-------|-------|
| OR2              | -3.82 | -3.64 | <LD   | -4.80 | <LD   | -5.51 | <LD   | <LD   | <LD   |
| WS1              | -2.41 | -2.53 | -4.03 | -1.59 | -2.74 | -2.83 | -3.16 | -4.05 | -4.15 |
| WS2              | -3.14 | -4.16 | <LD   | -4.17 | -4.41 | -4.46 | -3.24 | -3.46 | -3.51 |
| OR:WS1           | -2.73 | -3.46 | -3.89 | -2.55 | -3.06 | -3.52 | -4.73 | -4.93 | -4.84 |
| OR:WS2           | -3.99 | <LD   | <LD   | <LD   | <LD   | <LD   | -5.35 | -5.55 | <LD   |
| 80 ppm PAA       | <LD   |
| 200 ppm Chlorine | -3.01 | -3.15 | -3.36 | -3.83 | -1.51 | -4.04 | <LD   | <LD   | <LD   |

Abbreviations: OR: Oregano; WS: Winter Savory; OR:WS: Oregano and Winter Savory mixture; PAA: peroxyacetic acid. EO emulsion concentrations: 1: 0.94  $\mu\text{L/mL}$ ; 2: 1.88  $\mu\text{L/mL}$ ; LD: Limit of Detection.
